# Supplementary material for: Unmet Needs, Quality of Life, and Financial Toxicity Among Survivors of Lung Cancer
Source: PubMed Central journal article supplement — JAMA Netw Open. 2024 Apr 17;7(4):e246872. doi: 10.1001/jamanetworkopen.2024.6872 (PMC11024770; doi:10.1001/jamanetworkopen.2024.6872), 2024-04-17

## Supplementary Online Content

Hsu ML, Boulanger MC, Olson S, et al. Unmet needs, quality of life, and financial toxicity among survivors of lung cancer. *JAMA Netw Open*. 2024;7(2):e246872. doi:10.1001/jamanetworkopen.2024.6872

**eAppendix.** Needs Assessment Survey

**eTable 1.** Respondents With Completed vs Uncompleted Surveys

**eTable 2.** Univariate Analysis of Unmet Needs and Quality of Life (QOL) and Comprehensive Score for Financial Toxicity (COST)

**eTable 3.** Multivariate Analysis of Quality of Life (QOL) and Total Needs

**eTable 4.** Multivariate Analysis of Comprehensive Score for Financial Toxicity (COST) and Needs

**eFigure.** Lung Cancer Survivorship Care Framework

This supplementary material has been provided by the authors to give readers additional information about their work.

## **eAppendix.** Needs Assessment Survey

### Section I. About you

1. Education
  - a. Some high school
  - b. High school graduate
  - c. Some college
  - d. College graduate
  - e. More than college graduate
2. Insurance at diagnosis (select all that apply)
  - a. Private insurance
  - b. Medicare
  - c. Medicaid
  - d. I don't have health insurance
3. Current insurance (select all that apply)
  - a. Private insurance
  - b. Medicare
  - c. Medicaid
  - d. I don't have health insurance
4. Do you have a primary care provider
  - a. Yes
  - b. No
5. Living arrangements
  - a. Single or divorced or widowed
  - b. Married
  - c. Live alone
  - d. Live with friend, family, partner
6. Household income
  - a. <\$30,000
  - b. \$30,000-\$50,000
  - c. \$50,000-\$75,000
  - d. \$75,000-\$100,000
  - e. >\$100,000
7. Did your employment status change with cancer
  - a. Yes
  - b. No
8. If employment status changed, select all that apply
  - a. Lost job
  - b. Disability
  - c. Unemployment benefits
9. Current employment
  - a. Currently working
  - b. Retired
  - c. Unemployed

## Section II. Your needs and concerns

As a cancer survivor, you may experience some lasting side effects from your treatment. Please rate each topic according to how much of a need it is for you today. Please select the number on the scale from 1 (no need) to 5 (high need). Selecting 1 would indicate that you have no need and that this was not a problem for you as a result of having cancer. Selecting 5 would indicate that you have high need for additional help, and that this caused you a lot of concern or discomfort.

### Section IIa. Physical effects (1=no need, 5=high need)

1. Pain
2. Fatigue
3. Sleep disturbance
4. Memory and concentration
5. Nausea/vomiting
6. Poor appetite
7. Trouble swallowing
8. Dental or mouth problems
9. Trouble breathing
10. Weight change
11. Balance/mobility
12. Weakness
13. Numbness or tingling (neuropathy)
14. Swelling in arms or legs (lymphedema)
15. Osteoporosis/bone health
16. Hair or skin changes
17. Bowel or bladder changes
18. Hot flashes
19. Sexual and intimacy issues
20. Fertility issues

### Section IIb. Social issues (1=no need, 5=high need)

1. Managing daily activities
2. Returning to work
3. Health insurance
4. Financial concerns

### Section IIc. Emotional needs (1=no need, 5=high need)

1. Defining a new sense of normal
2. Living with uncertainty
3. Fear of recurrence
4. Managing difficult emotions: anger, fear, anxiety, depression

### Section IId. Medical needs (1=no need, 5=high need)

1. Who to call for medical problems
2. Who to call for follow up appointments and tests
3. Finding support resources

4. Keeping your primary care physicians informed of your cancer care

**eTable 1.** Respondents With Completed vs Uncompleted Surveys

| <b>Sociodemographic factors</b> | <b>Overall</b> | <b>Complete Survey</b> | <b>Incomplete Survey</b> | <b>Declined</b>  | <b>Withdrawn</b> | <b>p</b> |
|---------------------------------|----------------|------------------------|--------------------------|------------------|------------------|----------|
| N (%)                           | 360            | 232 (64.44)            | 35 (9.72)                | 32 (8.89)        | 61 (16.94)       |          |
| <b>Age</b>                      |                |                        |                          |                  |                  |          |
| < 65 years                      | 137 (38.06)    | 85 (36.64)             | 13 (37.14)               | 8 (25)           | 31 (50.82)       | 0.08     |
| >= 65 years                     | 223 (61.94)    | 147 (63.36)            | 22 (62.86)               | 24 (75)          | 30 (49.18)       |          |
| Median Age                      | 68 (60-75)     | 69 (60.5-75)           | 68 (61-75)               | 71.5 (63.5-76.5) | 64 (57-73)       | 0.09     |
| <b>Sex</b>                      |                |                        |                          |                  |                  |          |
| Female                          | 214 (59.44)    | 144 (62.07)            | 23 (65.71)               | 17 (53.13)       | 30 (49.18)       | 0.22     |
| Male                            | 146 (40.56)    | 88 (37.93)             | 12 (34.29)               | 15 (46.88)       | 31 (50.82)       |          |
| <b>Race</b>                     |                |                        |                          |                  |                  |          |
| African-American                | 70 (19.44)     | 33 (14.22)             | 5 (14.29)                | 10 (31.25)       | 22 (36.07)       | 0.003    |
| Caucasian                       | 248 (68.89)    | 172 (74.14)            | 27 (77.14)               | 17 (53.13)       | 32 (52.46)       |          |
| Other*                          | 42 (11.67)     | 27 (11.64)             | 3 (8.57)                 | 5 (15.63)        | 7 (11.48)        |          |
| <b>Smoking status</b>           |                |                        |                          |                  |                  |          |
| Current/Former                  | 229 (63.61)    | 144 (62.07)            | 20 (57.14)               | 24 (75)          | 41 (67.21)       | 0.39     |
| Never                           | 131 (36.39)    | 88 (37.93)             | 15 (42.86)               | 8 (25)           | 20 (32.79)       |          |
| <b>Marital Status</b>           |                |                        |                          |                  |                  |          |
| Married                         | 249 (69.17)    | 165 (71.12)            | 19 (54.29)               | 23 (71.88)       | 42 (68.85)       | 0.45     |
| Divorced/Single/Widowed         | 110 (30.56)    | 66 (28.45)             | 16 (45.71)               | 9 (28.13)        | 19 (31.15)       |          |
| Unknown                         | 1 (0.28)       | 1 (0.43)               | 0 (0)                    | 0 (0)            | 0 (0)            |          |
| <b>Treatment History</b>        |                |                        |                          |                  |                  |          |
| <b>Stage at Diagnosis</b>       |                |                        |                          |                  |                  |          |
| Stage I                         | 105 (29.17)    | 70 (30.17)             | 12 (34.29)               | 10 (31.25)       | 13 (21.31)       | 0.11     |
| Stage II                        | 36 (10)        | 22 (9.48)              | 6 (17.14)                | 2 (6.25)         | 6 (9.84)         |          |
| Stage III                       | 81 (22.5)      | 43 (18.53)             | 6 (17.14)                | 11 (34.38)       | 21 (34.43)       |          |
| Stage IV                        | 138 (38.33)    | 97 (41.81)             | 11 (31.43)               | 9 (28.13)        | 21 (34.43)       |          |
| <b>Tumor Histology</b>          |                |                        |                          |                  |                  |          |
| Adenocarcinoma                  | 288 (80)       | 194 (83.62)            | 24 (68.57)               | 29 (90.63)       | 41 (67.21)       | 0.02     |

|                                 |                |             |               |            |               |      |
|---------------------------------|----------------|-------------|---------------|------------|---------------|------|
| Squamous                        | 39<br>(10.83)  | 23 (9.91)   | 6 (17.14)     | 1 (3.13)   | 9<br>(14.75)  |      |
| Other                           | 33 (9.17)      | 15 (6.47)   | 5 (14.29)     | 2 (6.25)   | 11<br>(18.03) |      |
| ECOG at time of survey          |                |             |               |            |               |      |
| 0                               | 163<br>(45.28) | 110 (47.41) | 15<br>(42.86) | 16 (50)    | 22<br>(36.07) | 0.39 |
| 1                               | 160<br>(44.44) | 103 (44.4)  | 16<br>(45.71) | 13 (40.63) | 28<br>(45.9)  |      |
| 2+                              | 37<br>(10.28)  | 19 (8.19)   | 4 (11.43)     | 3 (9.38)   | 11<br>(18.03) |      |
| Time since diagnosis            |                |             |               |            |               |      |
| 1 - < 2 years                   | 101<br>(28.06) | 65 (28.02)  | 12<br>(34.29) | 12 (37.5)  | 12<br>(19.67) | 0.41 |
| 2 - < 5 years                   | 163<br>(45.28) | 101 (43.53) | 16<br>(45.71) | 12 (37.5)  | 34<br>(55.74) |      |
| >= 5 years                      | 96<br>(26.67)  | 66 (28.45)  | 7 (20)        | 8 (25)     | 15<br>(24.59) |      |
| Types of therapy every received |                |             |               |            |               |      |
| Surgery                         |                |             |               |            |               |      |
| No                              | 172<br>(47.78) | 107 (46.12) | 17<br>(48.57) | 16 (50)    | 32<br>(52.46) | 0.83 |
| Yes                             | 188<br>(52.22) | 125 (53.88) | 18<br>(51.43) | 16 (50)    | 29<br>(47.54) |      |
| Radiation                       |                |             |               |            |               |      |
| No                              | 142<br>(39.44) | 97 (41.81)  | 12<br>(34.29) | 10 (31.25) | 23<br>(37.7)  | 0.59 |
| Yes                             | 218<br>(60.56) | 135 (58.19) | 23<br>(65.71) | 22 (68.75) | 38<br>(62.3)  |      |
| Chemotherapy                    |                |             |               |            |               |      |
| No                              | 141<br>(39.17) | 95 (40.95)  | 14 (40)       | 13 (40.63) | 19<br>(31.15) | 0.57 |
| Yes                             | 219<br>(60.83) | 137 (59.05) | 21 (60)       | 19 (59.38) | 42<br>(68.85) |      |
| Immunotherapy                   |                |             |               |            |               |      |
| No                              | 225<br>(62.5)  | 151 (65.09) | 20<br>(57.14) | 18 (56.25) | 36<br>(59.02) | 0.59 |
| Yes                             | 135<br>(37.5)  | 81 (34.91)  | 15<br>(42.86) | 14 (43.75) | 25<br>(40.98) |      |
| Targeted therapy                |                |             |               |            |               |      |
| No                              | 220<br>(61.11) | 135 (58.19) | 26<br>(74.29) | 22 (68.75) | 37<br>(60.66) | 0.24 |
| Yes                             | 140<br>(38.89) | 97 (41.81)  | 9 (25.71)     | 10 (31.25) | 24<br>(39.34) |      |
| Lines of systemic therapy       |                |             |               |            |               |      |
| 0                               | 69<br>(19.17)  | 45 (19.4)   | 8 (22.86)     | 8 (25)     | 8<br>(13.11)  | 0.48 |

|                                   |                |             |               |            |               |      |
|-----------------------------------|----------------|-------------|---------------|------------|---------------|------|
| 1+                                | 291<br>(80.83) | 187 (80.6)  | 27<br>(77.14) | 24 (75)    | 53<br>(86.89) |      |
| Active therapy                    |                |             |               |            |               |      |
| No                                | 191<br>(53.06) | 117 (50.43) | 23<br>(65.71) | 19 (59.38) | 32<br>(52.46) | 0.33 |
| Yes                               | 169<br>(46.94) | 115 (49.57) | 12<br>(34.29) | 13 (40.63) | 29<br>(47.54) |      |
| Intent of last or active therapy  |                |             |               |            |               |      |
| Curative                          | 151<br>(41.94) | 92 (39.66)  | 19<br>(54.29) | 18 (56.25) | 22<br>(36.07) | 0.10 |
| Palliative                        | 209<br>(58.06) | 140 (60.34) | 16<br>(45.71) | 14 (43.75) | 39<br>(63.93) |      |
| Second primary malignancy         |                |             |               |            |               |      |
| No                                | 236<br>(65.56) | 148 (63.79) | 23<br>(65.71) | 23 (71.88) | 42<br>(68.85) | 0.76 |
| Yes                               | 124<br>(34.44) | 84 (36.21)  | 12<br>(34.29) | 9 (28.13)  | 19<br>(31.15) |      |
| Type of second primary malignancy |                |             |               |            |               |      |
| Lung only                         | 16 (12.9)      | 8 (9.52)    | 2 (16.67)     | 3 (33.33)  | 3<br>(15.79)  | 0.15 |
| Lung and/or other type            | 108<br>(87.1)  | 76 (90.48)  | 10<br>(83.33) | 6 (66.67)  | 16<br>(84.21) |      |
| Outpatient palliative care        |                |             |               |            |               |      |
| Yes                               | 46<br>(12.78)  | 32 (13.79)  | 4 (11.43)     | 0 (0)      | 10<br>(16.39) | 0.07 |
| No                                | 314<br>(87.22) | 200 (86.21) | 31<br>(88.57) | 32 (100)   | 51<br>(83.61) |      |

\*includes American Indian or Alaska Native, Asian, or Native Hawaiian and Other Pacific Islander.

**eTable 2.** Univariate Analysis of Unmet Needs and Quality of Life (QOL) and Comprehensive Score for Financial Toxicity (COST)

| Factor                                  | EORTC-Global Health Status/QOL Score (Median (IQR)) | p    | COST – Financial Toxicity Score (Median (IQR)) | p      |
|-----------------------------------------|-----------------------------------------------------|------|------------------------------------------------|--------|
| <b>Sociodemographic factor</b>          |                                                     |      |                                                |        |
| Age                                     |                                                     |      |                                                |        |
| < 65 years                              | 66.67                                               | 0.66 | 25 (20-32)                                     | 0.01   |
| >= 65 years                             | 66.67                                               |      | 28(24.2-35)                                    |        |
| Sex                                     |                                                     |      |                                                |        |
| Female                                  | 66.67 (50-83.33)                                    | 0.64 | 28 (22-33)                                     | 0.89   |
| Male                                    | 66.67 (50-83.33)                                    |      | 27.75 (22-34)                                  |        |
| Race                                    |                                                     |      |                                                |        |
| African-American                        | 66.67 (50-83.33)                                    | 0.60 | 28 (20-34)                                     | 0.19   |
| Caucasian                               | 66.67 (50-83.33)                                    |      | 28 (24-34)                                     |        |
| Other                                   | 66.67 (50-75)                                       |      | 25 (17-33)                                     |        |
| Smoking status                          |                                                     |      |                                                |        |
| Current/Former                          | 66.67 (50-83.33)                                    | 0.03 | 28 (23.5-34)                                   | 0.70   |
| Never                                   | 70.83 (54.17-83.33)                                 |      | 27 (21-34)                                     |        |
| Marital Status                          |                                                     |      |                                                |        |
| Married                                 | 66.67 (50-83.33)                                    | 0.43 | 28 (23-34)                                     | 0.91   |
| Divorced/Single/Widowed                 | 66.67 (50-83.33)                                    |      | 27.75 (21-34)                                  |        |
| Unknown                                 | 83.33 (83.33-83.33)                                 |      | 27.5 (27.5-27.5)                               |        |
| Household Income                        |                                                     |      |                                                |        |
| < \$30,000                              | 62.5 (50-66.67)                                     | 0.12 | 20.5 (17-26)                                   | 0.0003 |
| \$30,000-\$75,000                       | 66.67 (50-83.33)                                    |      | 27 (21-32)                                     |        |
| >\$75,000                               | 66.67 (50-83.33)                                    |      | 28 (24-36)                                     |        |
| Employment                              |                                                     |      |                                                |        |
| Employed                                | 75 (58.33-83.33)                                    | 0.01 | 27 (20-33)                                     | 0.0006 |
| Retired                                 | 66.67 (50-83.33)                                    |      | 28 (25-36)                                     |        |
| Unemployed/No response                  | 58.33 (50-66.67)                                    |      | 23.83 (15-29)                                  |        |
| Education                               |                                                     |      |                                                |        |
| High school or less                     | 58.33 (50-75)                                       | 0.09 | 25 (17-31)                                     | 0.05   |
| Some college or more                    | 66.67 (50-83.33)                                    |      | 28 (23.83-34)                                  |        |
| No response                             | 50 (50-50)                                          |      | 39 (39-39)                                     |        |
| Living arrangements                     |                                                     |      |                                                |        |
| Married/live with friend/family/partner | 66.67 (50-83.33)                                    | 0.69 | 28 (23-34)                                     | 0.28   |
| Single/divorced/widowed/live alone      | 66.67 (50-83.33)                                    |      | 27.75 (21-34)                                  |        |



|                                  |                     |        |               |       |
|----------------------------------|---------------------|--------|---------------|-------|
| No response                      | 54.17 (33.33-75)    |        | 19.5 (19-20)  |       |
| Current insurance                |                     |        |               |       |
| Private with or without Medicare | 66.67 (50-83.33)    | 0.11   | 28 (23-34)    | 0.32  |
| Medicare and/or Medicaid         | 66.67 (50-75)       |        | 26 (22-32)    |       |
| <b>Treatment History</b>         |                     |        |               |       |
| Stage at Diagnosis               |                     |        |               |       |
| Stage I                          | 75 (50-83.33)       | 0.61   | 28 (24.2-36)  | 0.32  |
| Stage II                         | 66.67 (58.33-83.33) |        | 27.75 (23-33) |       |
| Stage III                        | 66.67 (50-83.33)    |        | 28 (20-33)    |       |
| Stage IV                         | 66.67 (50-83.33)    |        | 27 (21-32)    |       |
| Tumor Histology                  |                     |        |               |       |
| Adenocarcinoma                   | 66.67 (50-83.33)    | 0.06   | 27.75 (23-34) | 0.81  |
| Squamous                         | 58.33 (41.67-75)    |        | 30 (22-34)    |       |
| Other                            | 66.67 (50-83.33)    |        | 25.3 (18-40)  |       |
| ECOG at time of survey           |                     |        |               |       |
| 0                                | 75 (58.33-83.33)    | <0.001 | 28 (21-35)    | 0.78  |
| 1                                | 66.67 (50-75)       |        | 28 (23-33)    |       |
| 2+                               | 50 (41.67-58.33)    |        | 27 (22-33)    |       |
| Time since diagnosis             |                     |        |               |       |
| 1 - < 2 years                    | 66.67 (50-83.33)    | 0.72   | 27 (20-34)    | 0.35  |
| 2 - < 5 years                    | 66.67 (50-83.33)    |        | 28 (22-34)    |       |
| >= 5 years                       | 75 (50-83.33)       |        | 28 (25-34)    |       |
| Types of therapy every received  |                     |        |               |       |
| Surgery                          |                     |        |               |       |
| No                               | 66.67 (50-83.33)    | 0.68   | 25 (20-32)    | 0.02  |
| Yes                              | 66.67 (50-83.33)    |        | 28 (25-34)    |       |
| Radiation                        |                     |        |               |       |
| No                               | 66.67 (50-83.33)    | 0.03   | 30 (25-37)    | 0.001 |
| Yes                              | 66.67 (50-83.33)    |        | 27 (20-32)    |       |
| Chemotherapy                     |                     |        |               |       |
| No                               | 75 (58.33-83.33)    | 0.005  | 28 (24-36)    | 0.05  |
| Yes                              | 66.67 (50-83.33)    |        | 27 (20-32)    |       |
| Immunotherapy                    |                     |        |               |       |
| No                               | 66.67 (50-83.33)    | 0.03   | 28 (23.83-34) | 0.17  |
| Yes                              | 66.67 (50-83.33)    |        | 27 (20-33)    |       |
| Targeted therapy                 |                     |        |               |       |
| No                               | 66.67 (50-83.33)    | 0.42   | 28 (24-34)    | 0.11  |
| Yes                              | 66.67 (50-83.33)    |        | 26 (21-32)    |       |
| Lines of systemic therapy        |                     |        |               |       |
| 0                                | 83.33 (58.33-83.33) | 0.02   | 31 (27-37)    | 0.001 |
| 1+                               | 66.67 (50-83.33)    |        | 27 (21-33)    |       |
| Active therapy                   |                     |        |               |       |

|                                                   |                     |          |                  |          |
|---------------------------------------------------|---------------------|----------|------------------|----------|
| No                                                | 66.67 (50-83.33)    | 0.73     | 29 (24-34)       | 0.02     |
| Yes                                               | 66.67 (50-83.33)    |          | 26 (20-32)       |          |
| Time since last therapy<br>(if no active therapy) |                     |          |                  |          |
| < 1 year                                          | 66.67 (50-75)       | 0.03     | 29 (21-33)       | 0.34     |
| 1-2 years                                         | 75 (50-83.33)       |          | 28 (22.5-38.5)   |          |
| > 2 years                                         | 75 (58.33-83.33)    |          | 31 (27-36)       |          |
| Intent of last or active<br>therapy               |                     |          |                  |          |
| Curative                                          | 75 (50-83.33)       | 0.09     | 28.5 (25-34)     | 0.02     |
| Palliative                                        | 66.67 (50-83.33)    |          | 26 (20-32.5)     |          |
| Second primary<br>malignancy                      |                     |          |                  |          |
| No                                                | 66.67 (50-83.33)    | 0.72     | 27.75 (21.5-34)  | 0.52     |
| Yes                                               | 66.67 (50-83.33)    |          | 28 (23.92-34)    |          |
| Type of second primary<br>malignancy              |                     |          |                  |          |
| Lung only                                         | 70.83 (50-83.33)    | 0.88     | 32.82 (27.75-38) | 0.09     |
| Lung and/or other<br>type                         | 66.67 (50-83.33)    |          | 28 (21.5-33.5)   |          |
| Outpatient palliative<br>care                     |                     |          |                  |          |
| Yes                                               | 66.67 (41.67-83.33) | 0.53     | 28 (22-34)       | 0.72     |
| No                                                | 66.67 (50-83.33)    |          | 27 (21-33.5)     |          |
| <b>Needs Assessment</b>                           |                     |          |                  |          |
| Total needs                                       | -0.56287            | < 0.0001 | -0.41872         | < 0.0001 |
| Total physical needs                              | -0.44948            | < 0.0001 | -0.25964         | < 0.0001 |
| Total social needs                                | -0.44597            | < 0.0001 | -0.57606         | < 0.0001 |
| Total emotional needs                             | -0.3832             | < 0.0001 | -0.26786         | < 0.0001 |
| Total medical needs                               | -0.40987            | < 0.0001 | -0.31463         | < 0.0001 |
| Physical need                                     |                     |          |                  |          |
| Trouble breathing                                 | -0.4173             | < 0.0001 | -0.15008         | 0.02     |
| Fatigue                                           | -0.56371            | < 0.0001 | -0.28287         | < 0.0001 |
| Sleep disturbance                                 | -0.34882            | < 0.0001 | -0.2129          | 0.001    |
| Pain                                              | -0.43652            | < 0.0001 | -0.18102         | 0.006    |
| Financial Toxicity<br>(COST)                      | 0.29099             | < 0.0001 |                  |          |
| <b>EORTC</b>                                      |                     |          |                  |          |
| Global Health<br>Status/QoL Score                 |                     |          | 0.29099          | < 0.0001 |
| Physical Functioning                              |                     |          | 0.14483          | 0.03     |
| Role Functioning                                  |                     |          | 0.29056          | < 0.0001 |
| Emotional<br>functioning                          |                     |          | 0.41071          | < 0.0001 |
| Cognitive functioning                             |                     |          | 0.20301          | 0.002    |
| Social functioning                                |                     |          | 0.24362          | 0.0002   |

|         |  |  |          |          |
|---------|--|--|----------|----------|
| Fatigue |  |  | -0.27351 | < 0.0001 |
| Pain    |  |  | -0.12484 | 0.06     |
| Dyspnea |  |  | -0.16695 | 0.01     |

**eTable 3.** Multivariate Analysis of Quality of Life (QOL) and Total Needs

| Parameter                     | Comparator vs Reference        | Unadjusted   |         | Adjusted      |       |
|-------------------------------|--------------------------------|--------------|---------|---------------|-------|
|                               |                                | Beta (SE)    | p       | Beta (SE)     | p     |
| Age                           | >=65 vs < 65                   | 2.07 (2.89)  | 0.47    | -0.29 (2.54)  | 0.91  |
| Sex                           | Female vs Male                 | -1.59 (2.87) | 0.58    | 0.3 (2.45)    | 0.90  |
| Race                          | African American vs Caucasian  | 2.75 (4.03)  | 0.44    | 4.96 (3.3)    | 0.25  |
|                               | Other vs Caucasian             | -4.24 (4.39) |         | -2.04 (3.73)  |       |
| Income                        | < \$30,000 vs \$75,000+        | -8.14 (5.26) | 0.27    | 1.67 (4.58)   | 0.46  |
|                               | \$30,000-\$75,000 vs \$75,000+ | -2.37 (3.25) |         | 3.44 (2.74)   |       |
| Smoking status                | Current/Former vs Never        | -5.71 (2.85) | 0.05    | -4.79 (2.62)  | 0.07  |
| ECOG PS                       | 1 vs 0                         | -11.85 (2.7) | <.001   | -8.76 (2.53)  | <.001 |
|                               | 2+ vs 0                        | -25.79 (4.9) |         | -18.54 (4.45) |       |
| Lines of systemic therapy     | 1+ vs 0                        | -7.28 (3.49) | 0.04    | 3.26 (3.71)   | 0.38  |
| Active therapy                | Yes vs No                      | -0.71 (2.79) | 0.80    | 1.73 (3.02)   | 0.57  |
| Intent of active/last therapy | Palliative vs Curative         | 4.09 (2.84)  | 0.15    | 0.73 (3.08)   | 0.81  |
| Any radiation                 | Yes vs No                      | -6.2 (2.79)  | 0.03    | 0.53 (2.48)   | 0.83  |
| Financial Toxicity Score      |                                | 0.69 (0.15)  | <.0001  | 0.25 (0.15)   | 0.09  |
| Total needs                   |                                | -1.59 (0.15) | <0.0001 | -1.37 (0.18)  | <.001 |

**eTable 4.** Multivariate Analysis of Comprehensive Score for Financial Toxicity (COST) and Needs

**eTable 4a.** Multivariate analysis of COST and Specific Needs

| Parameter                     | Comparator vs Reference        | Unadjusted   |       | Adjusted     |      |
|-------------------------------|--------------------------------|--------------|-------|--------------|------|
|                               |                                | Beta (SE)    | p     | Beta (SE)    | p    |
| Age                           | >=65 vs < 65                   | 3.27 (1.19)  | 0.01  | 1.45 (1.09)  | 0.19 |
| Sex                           | Female vs Male                 | 0.2 (1.2)    | 0.87  | 0.48 (1.08)  | 0.65 |
| Race                          | African American vs Caucasian  | -0.76 (1.68) | 0.28  | -0.61 (1.48) | 0.92 |
|                               | Other vs Caucasian             | -2.9 (1.83)  |       | -0.02 (1.6)  |      |
| Income                        | < \$30,000 vs \$75,000+        | -8.82 (2.13) | <.001 | -4.69 (1.99) | 0.05 |
|                               | \$30,000-\$75,000 vs \$75,000+ | -2.51 (1.32) |       | -1.39 (1.19) |      |
| Smoking status                | Current/Former vs Never        | -0.26 (1.2)  | 0.83  | -0.6 (1.14)  | 0.60 |
| ECOG PS                       | 1 vs 0                         | -0.16 (1.22) | 0.71  | 1.73 (1.12)  | 0.30 |
|                               | 2+ vs 0                        | -1.84 (2.21) |       | 1.34 (2.02)  |      |
| Lines of systemic therapy     | 1+ vs 0                        | -4.76 (1.44) | <0.01 | -1.07 (1.59) | 0.50 |
| Active therapy                | Yes vs No                      | -2.42 (1.16) | 0.04  | -1.94 (1.29) | 0.13 |
| Intent of active/last therapy | Palliative vs Curative         | 2.57 (1.18)  | 0.03  | -0.1 (1.32)  | 0.94 |
| Any radiation                 | Yes vs No                      | -4.03 (1.15) | <.001 | -2.23 (1.06) | 0.04 |
| Global QOL Score              |                                | 0.12 (0.03)  | <.001 | 0.03 (0.03)  | 0.32 |
| Total physical needs          |                                | -0.84 (0.2)  | <.001 | 0.07 (0.23)  | 0.77 |

|                       |  |                 |        |                 |       |
|-----------------------|--|-----------------|--------|-----------------|-------|
| Total social needs    |  | -4.14<br>(0.39) | <.001  | -3.4 (0.53)     | <.001 |
| Total emotional needs |  | -1.61<br>(0.38) | <.001  | 0.09 (0.43)     | 0.84  |
| Total medical needs   |  | -1.9 (0.38)     | <.0001 | -0.11<br>(0.42) | 0.79  |

eTable 4b. Multivariate analysis of COST and Total Needs

| Parameter                     | Comparator vs Reference        | Unadjusted   |       | Adjusted        |       |
|-------------------------------|--------------------------------|--------------|-------|-----------------|-------|
|                               |                                | Beta (SE)    | p     | Beta (SE)       | p     |
| Age                           | >=65 vs < 65                   | 3.27 (1.19)  | 0.01  | 2.3 (2.58)      | 0.05  |
| Sex                           | Female vs Male                 | 0.2 (1.2)    | 0.87  | 1.72 (2.54)     | 0.13  |
| Race                          | African American vs Caucasian  | -0.76 (1.68) | 0.28  | -0.81<br>(3.47) | 0.34  |
|                               | Other vs Caucasian             | -2.9 (1.83)  |       | -0.08<br>(3.78) |       |
| Income                        | < \$30,000 vs \$75,000+        | -8.82 (2.13) | <.001 | -8.23<br>(4.75) | <.001 |
|                               | \$30,000-\$75,000 vs \$75,000+ | -2.51 (1.32) |       | -2.6 (2.79)     |       |
| Smoking status                | Current/Former vs Never        | -0.26 (1.2)  | 0.83  | 0.28 (2.68)     | 0.82  |
| ECOG PS                       | 1 vs 0                         | -0.16 (1.22) | 0.71  | 2.1 (2.56)      | 0.67  |
|                               | 2+ vs 0                        | -1.84 (2.21) |       | 2.61 (4.55)     |       |
| Lines of systemic therapy     | 1+ vs 0                        | -4.76 (1.44) | <0.01 | -0.71<br>(3.76) | 0.68  |
| Active therapy                | Yes vs No                      | -2.42 (1.16) | 0.04  | -1.73<br>(3.06) | 0.21  |
| Intent of active/last therapy | Palliative vs Curative         | 2.57 (1.18)  | 0.03  | 0.16 (3.11)     | 0.91  |

|                  |           |              |       |                 |       |
|------------------|-----------|--------------|-------|-----------------|-------|
| Any radiation    | Yes vs No | -4.03 (1.15) | <.001 | -2.57<br>(2.52) | 0.02  |
| Global QOL Score |           | 0.12 (0.03)  | <.001 | 0.05 (0.16)     | 0.09  |
| Total needs      |           | -0.5 (0.07)  | <.001 | -0.33<br>(0.45) | <0.01 |

## eFigure. Lung Cancer Survivorship Care Framework

Cancer survivorship care quality framework for survivors of lung cancer (Framework adapted from Nekhlyudov et al. This work is written by US Government employees and is in the public domain in the US. Permission to adapt figure for survivors of lung cancer obtained from Dr. Nekhlyudov. Findings from our cross-sectional survey are included in italics.)

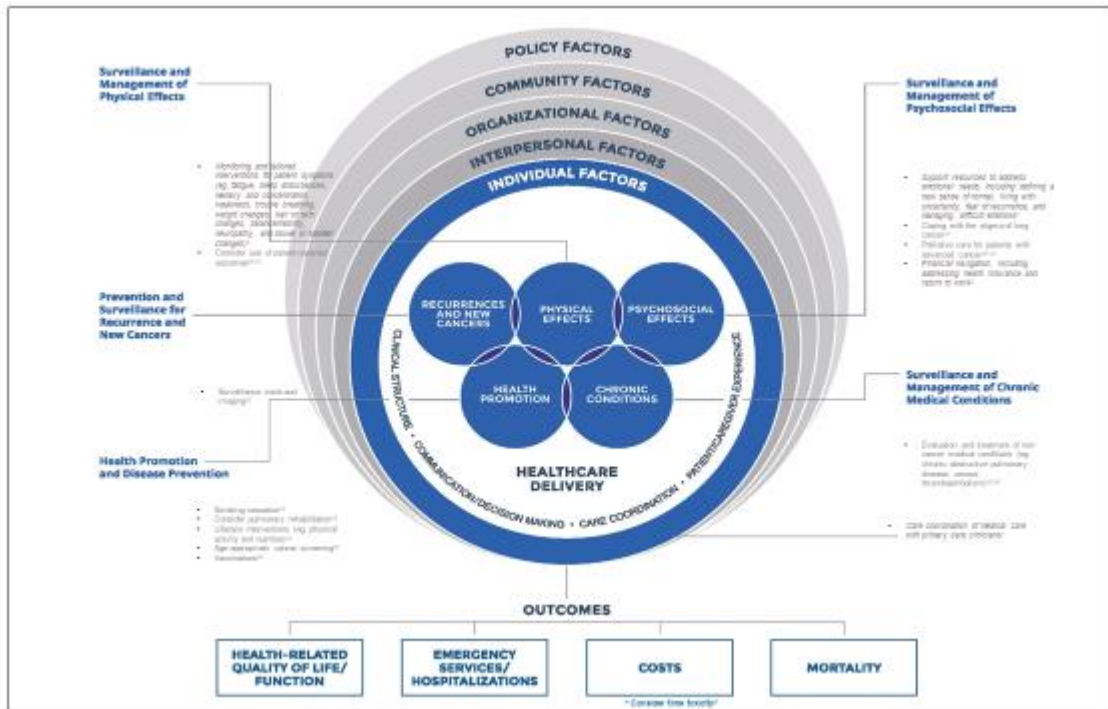

Supplement: jamanetwopen-e246872-s001.pdf [file jamanetwopen-e246872-s001.pdf]
