# Supplementary material for: Unmet Needs, Quality of Life, and Financial Toxicity Among Survivors of Lung Cancer
Source: PubMed Central journal article supplement — JAMA Netw Open. 2024 Apr 17;7(4):e246872. doi: 10.1001/jamanetworkopen.2024.6872 (PMC11024770; doi:10.1001/jamanetworkopen.2024.6872), 2024-04-17
Supplement: jamanetwopen-e246872-s002.pdf [file jamanetwopen-e246872-s002.pdf]

## Data Sharing Statement

Hsu. Unmet Needs, Quality of Life, and Financial Toxicity Among Survivors of Lung Cancer. *JAMA Netw Open*. Published April 17, 2024. doi:10.1001/jamanetworkopen.2024.6872

### Data

**Data available:** Yes

**Data types:** Deidentified participant data

**How to access data:** Please direct data requests to the senior author Dr. Josephine Feliciano at [jfelici4@jhmi.edu](mailto:jfelici4@jhmi.edu).

**When available:** With publication

### Supporting Documents

**Document types:** None

### Additional Information

**Who can access the data:** Data may be made available on reasonable request by researchers whose proposed use of the data has been approved.

**Types of analyses:** Data may be made available for a specific approved project.

**Mechanisms of data availability:** Data sharing would require a signed data access agreement.
